# Supplementary material for: Ecological Interactions among Thrips, Soybean Plants, and Soybean Vein Necrosis Virus in Pennsylvania, USA
Source: MDPI journal article supplement (doi:10.3390/v15081766), 2023-08-18
Supplement: s1 [file s1]

**Table S1.** Quantification of virus titers for the establishment of protocol for SVN<sub>V</sub> inoculation through qRT PCR

| <b>Treatment</b>         | <b>Gene</b> | <b>CT Value</b> |
|--------------------------|-------------|-----------------|
| Infected Plant           | NP gene     | 37.10885        |
| Infected Plant           | NP gene     | 36.60115        |
| Healthy Plant            | NP gene     | NaN             |
| Healthy Plant            | NP gene     | NaN             |
| Water                    | NP gene     | NaN             |
| Water                    | NP gene     | NaN             |
| Mechanical Inoculation   | NP gene     | NaN             |
| Mechanical Inoculation   | NP gene     | NaN             |
| Syringe Inoculation      | NP gene     | 37.18007        |
| Syringe Inoculation      | NP gene     | 35.90067        |
| Thrips 5 (Transmission)  | NP gene     | 38.22273        |
| Thrips 5 (Transmission)  | NP gene     | 38.11723        |
| Thrips 10 (Transmission) | NP gene     | 36.75315        |
| Thrips 10 (Transmission) | NP gene     | 35.85314        |
| Thrips 15 (Transmission) | NP gene     | 36.19639        |
| Thrips 15 (Transmission) | NP gene     | 38.25706        |
| Infected plant           | SE gene     | 30.02398        |
| Infected plant           | SE gene     | 29.83493        |
| Healthy plant            | SE gene     | 39.57612        |
| Healthy plant            | SE gene     | 39.57612        |
| Water                    | SE gene     | NaN             |
| Water                    | SE gene     | NaN             |
| Mechanical Inoculation   | SE gene     | 32.19139        |
| Mechanical Inoculation   | SE gene     | 31.9264         |
| Syringe Inoculation      | SE gene     | 32.64924        |
| Syringe Inoculation      | SE gene     | 32.69367        |
| Thrips 5 (Transmission)  | NV gene     | 27.00357        |
| Thrips 5 (Transmission)  | NV gene     | 27.11734        |
| Thrips 10 (Transmission) | NV gene     | 28.8004         |
| Thrips 10 (Transmission) | NV gene     | 28.48253        |
| Thrips 15 (Transmission) | Nv gene     | 34.45782        |

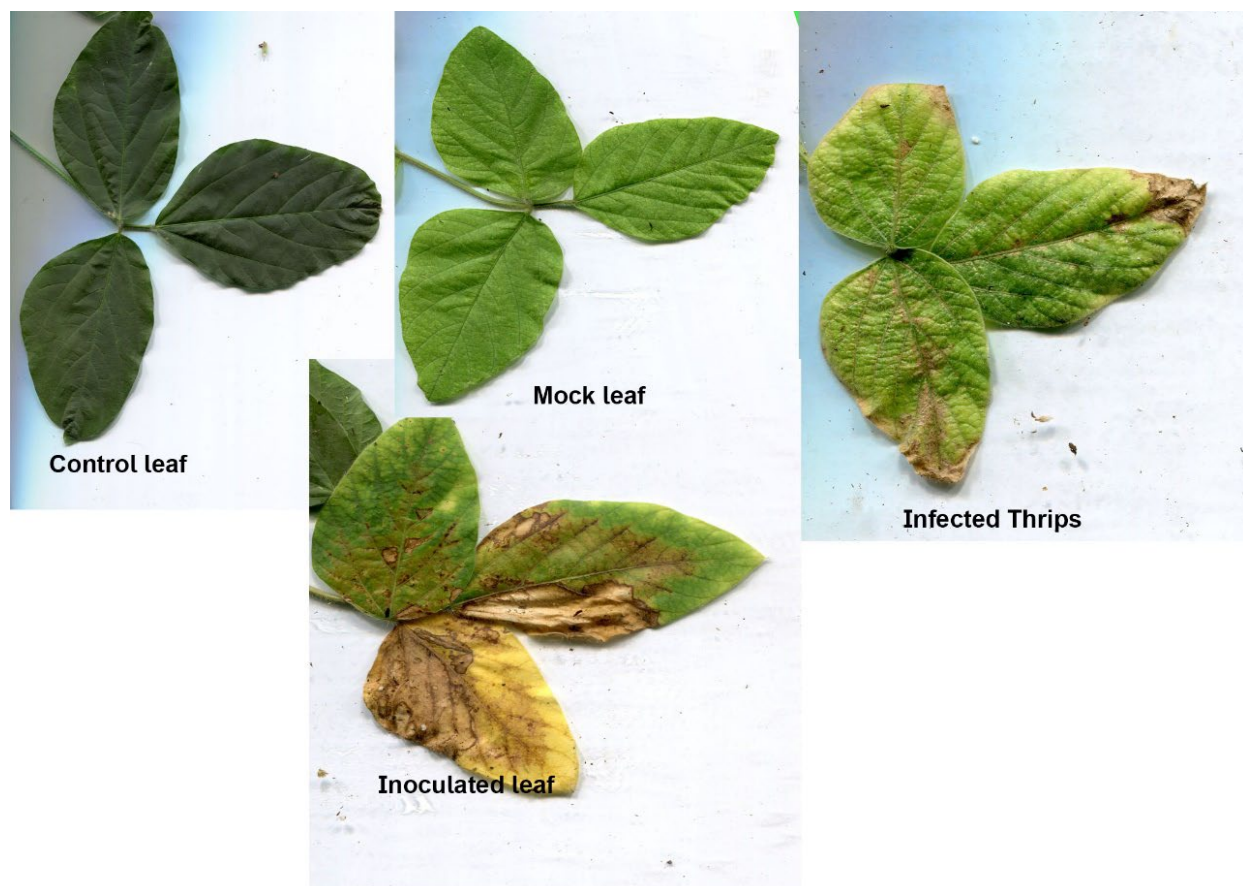

**Figure S1.** Plant leaves across the different treatments.

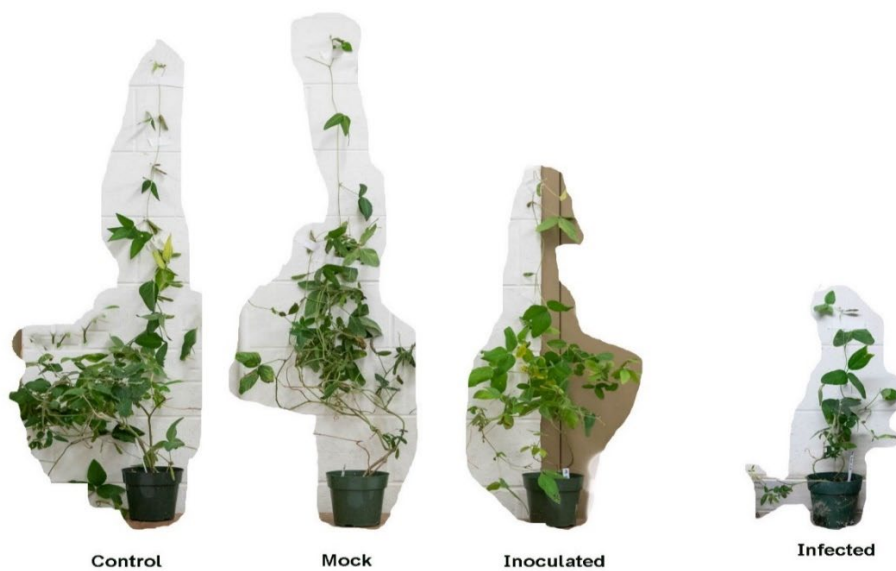

**Figure S2.** Effect of soybean vein necrosis virus (SVNV) on general plant health.

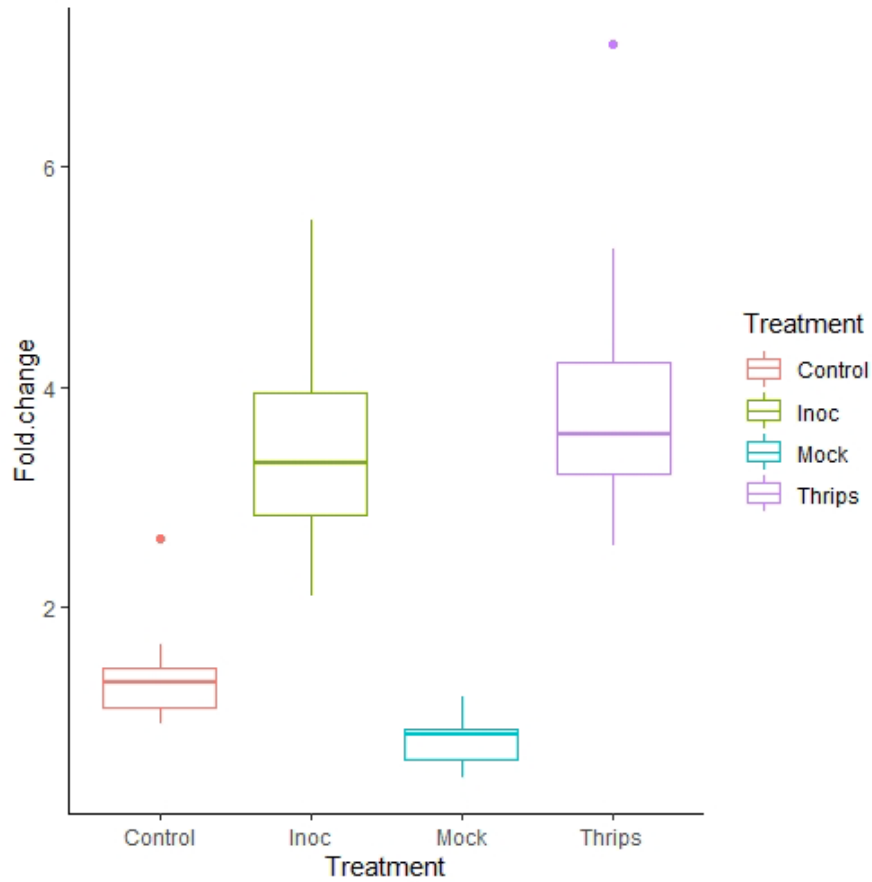

**Figure S3.** After one month of inoculation, plants of different treatments were checked with ELISA (Agdia, USA) for virus presence and compared with buffer PBST. OD values taken through the ELISA plate reader at 405 nm were used to compare the virus titers across the treatments. The plants that had ELISA values greater than 3x the control or the buffer treatment were considered positive for soybean vein necrosis virus (SVNV). Here Inoc= mechanically inoculated plants. Thrips= SVNV + Thrips infected plants, control = healthy uninfected plants, mock= plants syringe included with buffer only.
